# Supplementary material for: Cyanotoxin Screening in BACA Culture Collection: Identification of New Cylindrospermopsin Producing Cyanobacteria
Source: MDPI journal article supplement (doi:10.3390/toxins13040258), 2021-04-03
Supplement: s1 [file s1]

**Table S1.** BACA strains information, taxonomical identification and habitat.

| Strain Code | Order                  | Family                    | Species                        | Ecosystem       | Habitat  | Local                       | Island     |
|-------------|------------------------|---------------------------|--------------------------------|-----------------|----------|-----------------------------|------------|
| BACA0001    | <i>Nostocales</i>      | <i>Nostocaceae</i>        | <i>Nostoc</i> sp.              | Freshwater Lake | Plankton | Lagoa do Peixinho           | Pico       |
| BACA0002    | <i>Nostocales</i>      | <i>Nostocaceae</i>        | <i>Nostoc</i> sp.              | Freshwater Lake | Plankton | Lagoa das Furnas            | São Miguel |
| BACA0003    | <i>Nostocales</i>      | <i>Nostocaceae</i>        | <i>Trichormus</i> sp.          | Freshwater Lake | Plankton | Lagoa do Capitão            | Pico       |
| BACA0004    | <i>Nostocales</i>      | <i>Rivulariaceae</i>      | <i>Rivularia</i> sp.           | Freshwater Lake | Plankton | Lagoa Azul                  | São Miguel |
| BACA0005    | <i>Nostocales</i>      | <i>Scytonemataceae</i>    | <i>Scytonematopsis</i> sp.     | Freshwater Lake | Plankton | Lagoa do Peixinho           | Pico       |
| BACA0006    | <i>Nostocales</i>      | <i>Rivulariaceae</i>      | <i>Calothrix</i> sp.           | Freshwater Lake | Plankton | Lagoa das Empadadas Norte   | São Miguel |
| BACA0007    | <i>Oscillatoriales</i> | <i>Oscillatoriaceae</i>   | <i>Kamptonema</i> sp.          | Freshwater Lake | Plankton | Lagoas das Empadadas Sul    | São Miguel |
| BACA0008    | <i>Oscillatoriales</i> | <i>Microcoleaceae</i>     | <i>Arthrospira jenneri</i>     | Freshwater Lake | Plankton | Lagoa do Pico D'el Rei      | São Miguel |
| BACA0009    | <i>Nostocales</i>      | <i>Nostocaceae</i>        | <i>Nostoc paludosum</i>        | Freshwater Lake | Plankton | Lagoa Azul                  | São Miguel |
| BACA0010    | <i>Nostocales</i>      | <i>Nostocaceae</i>        | <i>Nostoc punctiforme</i>      | Freshwater Lake | Plankton | Lagoa de São Brás           | São Miguel |
| BACA0011    | <i>Oscillatoriales</i> | <i>Oscillatoriaceae</i>   | <i>Arthrospira jenneri</i>     | Freshwater Lake | Plankton | Lagoa do Areeiro            | São Miguel |
| BACA0012    | <i>Synechococcales</i> | <i>Oculatellaceae</i>     | <i>Tildenielli</i> sp.         | Freshwater Lake | Plankton | Lagoa das Furnas            | São Miguel |
| BACA0013    | <i>Nostocales</i>      | <i>Nostocaceae</i>        | <i>Nostocaceae</i>             | Freshwater Lake | Plankton | Lagoa Azul                  | São Miguel |
| BACA0014    | <i>Synechococcales</i> | <i>Pseudanabaenaceae</i>  | <i>Pseudanabaena minima</i>    | Freshwater Lake | Plankton | Lagoa Rasa da Serra Devassa | São Miguel |
| BACA0015    | <i>Synechococcales</i> | <i>Pseudanabaenaceae</i>  | <i>Pseudanabaena</i> sp.       | Freshwater Lake | Plankton | Lagoa do Areeiro            | São Miguel |
| BACA0016    | <i>Synechococcales</i> | <i>Pseudanabaenaceae</i>  | <i>Pseudanabaena limnetica</i> | Freshwater Lake | Plankton | Lagoa do Caiado             | Pico       |
| BACA0017    | <i>Nostocales</i>      | <i>Microchaetaceae</i>    | <i>Microchaete tenera</i>      | Freshwater Lake | Plankton | Lagoa Rosada                | Pico       |
| BACA0018    | <i>Nostocales</i>      | <i>Microchaetaceae</i>    | <i>Coleospermum</i> sp.        | Freshwater Lake | Plankton | Lagoa Comprida              | Flores     |
| BACA0019    | <i>Synechococcales</i> | <i>Synechococcaceae</i>   | <i>Cyanobium</i> sp.           | Freshwater Lake | Plankton | Lagoa Azul                  | São Miguel |
| BACA0020    | <i>Nostocales</i>      | <i>Scytonemataceae</i>    | <i>Scytonematopsis</i> sp.     | Freshwater Lake | Plankton | Lagoa Comprida              | Flores     |
| BACA0021    | <i>Nostocales</i>      | <i>Microchaetaceae</i>    | <i>Coleospermum</i> sp.        | Freshwater Lake | Plankton | Lagoa do Peixinho           | Pico       |
| BACA0022    | <i>Nostocales</i>      | <i>Fortieaceae</i>        | <i>Fortiea</i> sp.             | Freshwater Lake | Plankton | Lagoa do Paul               | Pico       |
| BACA0023    | <i>Nostocales</i>      | <i>Nostocaceae</i>        | <i>Nostoc commune</i>          | Freshwater Lake | Plankton | Lagoa do Peixinho           | Pico       |
| BACA0024    | <i>Synechococcales</i> | <i>Leptolyngbyaceae</i>   | <i>Planktolyngbya</i> sp.      | Freshwater Lake | Plankton | Lagoa Azul                  | São Miguel |
| BACA0025    | <i>Nostocales</i>      | <i>Aphanizomenonaceae</i> | <i>unidentified species</i>    | Freshwater Lake | Plankton | Lagoa Rosada                | Pico       |
| BACA0026    | <i>Nostocales</i>      | <i>Nostocaceae</i>        | <i>Nostoc punctiforme</i>      | Freshwater Lake | Plankton | Lagoa de São Brás           | São Miguel |
| BACA0027    | <i>Synechococcales</i> | <i>Pseudanabaenaceae</i>  | <i>Limnothrix</i> sp.          | Freshwater Lake | Plankton | Lagoa das Furnas            | São Miguel |
| BACA0028    | <i>Nostocales</i>      | <i>Tolypothrichaceae</i>  | <i>Tolypothrix</i> s.l.        | Freshwater Lake | Plankton | Lagoa Rasa das Sete Cidades | São Miguel |
| BACA0029    | <i>Nostocales</i>      | <i>Aphanizomenonaceae</i> | <i>Aphanizomenon</i> sp.       | Freshwater Lake | Plankton | Lagoa Azul                  | São Miguel |
| BACA0030    | <i>Nostocales</i>      | <i>Aphanizomenonaceae</i> | <i>Dolichospermum</i> sp.      | Freshwater Lake | Plankton | Lagoa Azul                  | São Miguel |

|          |                        |                           |                                    |                 |          |                    |            |
|----------|------------------------|---------------------------|------------------------------------|-----------------|----------|--------------------|------------|
| BACA0031 | <i>Nostocales</i>      | <i>Aphanizomenonaceae</i> | <i>unidentified species</i>        | Freshwater Lake | Plankton | Lagoa do Caiado    | Pico       |
| BACA0032 | <i>Nostocales</i>      | <i>Scytonemataceae</i>    | <i>Scytonematopsis sp.</i>         | Freshwater Lake | Plankton | Lagoa do Congro    | São Miguel |
| BACA0033 | <i>Nostocales</i>      | <i>Microchaetaceae</i>    | <i>Coleospermum sp.</i>            | Freshwater Lake | Plankton | Lagoa Comprida     | Flores     |
| BACA0034 | <i>Nostocales</i>      | <i>Aphanizomenonaceae</i> | <i>Dolichospermum sp.</i>          | Freshwater Lake | Plankton | Lagoa do Fogo      | São Miguel |
| BACA0035 | <i>Nostocales</i>      | <i>Nostocaceae</i>        | <i>Nostoc sp.</i>                  | Freshwater Lake | Plankton | Lagoa das Furnas   | São Miguel |
| BACA0036 | <i>Nostocales</i>      | <i>Nostocaceae</i>        | <i>Nostoc sp.</i>                  | Freshwater Lake | Plankton | Lagoa da Lomba     | Flores     |
| BACA0037 | <i>Nostocales</i>      | <i>Microchaetaceae</i>    | <i>Coleospermum sp.</i>            | Freshwater Lake | Plankton | Lagoa da Lomba     | Flores     |
| BACA0038 | <i>Nostocales</i>      | <i>Nostocaceae</i>        | <i>cf. Isocystis planctonica</i>   | Freshwater Lake | Plankton | Lagoa da Lomba     | Flores     |
| BACA0039 | <i>Nostocales</i>      | <i>Nostocaceae</i>        | <i>Nostoc sp.</i>                  | Freshwater Lake | Plankton | Lagoa Negra        | Flores     |
| BACA0040 | <i>Nostocales</i>      | <i>Microchaetaceae</i>    | <i>Coleospermum sp.</i>            | Freshwater Lake | Plankton | Lagoa do Peixinho  | Pico       |
| BACA0041 | <i>Nostocales</i>      | <i>Aphanizomenonaceae</i> | <i>Aphanizomenon gracile</i>       | Freshwater Lake | Plankton | Lagoa de Santiago  | São Miguel |
| BACA0042 | <i>Nostocales</i>      | <i>Nostocaceae</i>        | <i>Nostoc sp.</i>                  | Freshwater Lake | Plankton | Lagoa de Santiago  | São Miguel |
| BACA0043 | <i>Nostocales</i>      | <i>Tolypothrichaceae</i>  | <i>Tolypothrix sp.</i>             | Freshwater Lake | Plankton | Lagoa Verde        | São Miguel |
| BACA0044 | <i>Nostocales</i>      | <i>Aphanizomenonaceae</i> | <i>Dolichospermum delicatulum</i>  | Freshwater Lake | Plankton | Lagoa do Fogo      | São Miguel |
| BACA0045 | <i>Synechococcales</i> | <i>Pseudanabaenaceae</i>  | <i>Limnothrix sp.</i>              | Freshwater Lake | Plankton | Lagoa das Furnas   | São Miguel |
| BACA0046 | <i>Nostocales</i>      | <i>Microchaetaceae</i>    | <i>Coleospermum sp.</i>            | Freshwater Lake | Plankton | Lagoa da Lomba     | Flores     |
| BACA0047 | <i>Nostocales</i>      | <i>Rivulariaceae</i>      | <i>Calothrix sp.</i>               | Freshwater Lake | Plankton | Lagoa Funda        | Flores     |
| BACA0048 | <i>Synechococcales</i> | <i>Pseudanabaenaceae</i>  | <i>Limnothrix sp.</i>              | Freshwater Lake | Plankton | Lagoa Funda        | Flores     |
| BACA0049 | <i>Nostocales</i>      | <i>Tolypothrichaceae</i>  | <i>Tolypothrix sp.</i>             | Freshwater Lake | Plankton | Lagoa do Capitão   | Pico       |
| BACA0050 | <i>Nostocales</i>      | <i>Aphanizomenonaceae</i> | <i>Dolichospermum s.l.</i>         | Freshwater Lake | Plankton | Lagoa Rosada       | Pico       |
| BACA0051 | <i>Nostocales</i>      | <i>Nostocaceae</i>        | <i>Nostoc sp.</i>                  | Freshwater Lake | Plankton | Lagoa do Caldeirão | Corvo      |
| BACA0052 | <i>Nostocales</i>      | <i>Nostocaceae</i>        | <i>Nostoc paludosum</i>            | Freshwater Lake | Plankton | Lagoa do Caldeirão | Corvo      |
| BACA0053 | <i>Nostocales</i>      | <i>Nostocaceae</i>        | <i>Nostoc cf. sphaericum</i>       | Freshwater Lake | Plankton | Lagoa do Caldeirão | Corvo      |
| BACA0054 | <i>Synechococcales</i> | <i>Leptolyngbyaceae</i>   | <i>Stenomitos sp.</i>              | Freshwater Lake | Plankton | Lagoa do Peixinho  | Pico       |
| BACA0055 | <i>Nostocales</i>      | <i>Microchaetaceae</i>    | <i>Microchaete tenera</i>          | Freshwater Lake | Plankton | Lagoa Rosada       | Pico       |
| BACA0056 | <i>Nostocales</i>      | <i>Tolypothrichaceae</i>  | <i>Tolypothrix cf. helicophila</i> | Freshwater Lake | Plankton | Lagoa Rosada       | Pico       |
| BACA0057 | <i>Nostocales</i>      | <i>Nostocaceae</i>        | <i>Nostoc sp.</i>                  | Freshwater Lake | Plankton | Lagoa do Canário   | São Miguel |
| BACA0058 | <i>Nostocales</i>      | <i>Nostocaceae</i>        | <i>Nostoc sp.</i>                  | Freshwater Lake | Plankton | Lagoa do Fogo      | São Miguel |
| BACA0059 | <i>Nostocales</i>      | <i>Nostocaceae</i>        | <i>Nostoc sp.</i>                  | Freshwater Lake | Plankton | Lagoa das Furnas   | São Miguel |
| BACA0060 | <i>Nostocales</i>      | <i>Rivulariaceae</i>      | <i>Calothrix sp.</i>               | Freshwater Lake | Plankton | Lagoa das Furnas   | São Miguel |
| BACA0061 | <i>Nostocales</i>      | <i>Nostocaceae</i>        | <i>Nostoc sp.</i>                  | Freshwater Lake | Plankton | Lagoa da Lomba     | Pico       |
| BACA0062 | <i>Nostocales</i>      | <i>Microchaetaceae</i>    | <i>Microchaete tenera</i>          | Freshwater Lake | Plankton | Lagoa da Lomba     | Pico       |
| BACA0063 | <i>Nostocales</i>      | <i>Nostocaceae</i>        | <i>Nostoc sp.</i>                  | Freshwater Lake | Plankton | Lagoa de São Brás  | São Miguel |

|          |                        |                          |                                                   |                 |              |                             |            |
|----------|------------------------|--------------------------|---------------------------------------------------|-----------------|--------------|-----------------------------|------------|
| BACA0064 | <i>Nostocales</i>      | <i>Tolypothrichaceae</i> | <i>Tolypothrix</i> sp.                            | Freshwater Lake | Plankton     | Lagoa do Paul               | Pico       |
| BACA0065 | <i>Cyanobacterium</i>  | <i>Cyanobacteriaceae</i> | <i>Cyanobacterium</i> cf. <i>synechococcoides</i> | Freshwater Lake | Plankton     | Lagoa das Furnas            | São Miguel |
| BACA0066 | <i>Nostocales</i>      | <i>Tolypothrichaceae</i> | <i>Tolypothrix</i> sp.                            | Freshwater Lake | Plankton     | Lagoa do Congro             | São Miguel |
| BACA0067 | <i>Nostocales</i>      | <i>Nostocaceae</i>       | <i>Anabaena</i> sp.                               | Freshwater Lake | Plankton     | Lagoas das Empadadas Sul    | São Miguel |
| BACA0068 | <i>Nostocales</i>      | <i>Nostocaceae</i>       | <i>Nostoc</i> sp.                                 | Freshwater Lake | Plankton     | Lagoa do Canário            | São Miguel |
| BACA0069 | <i>Nostocales</i>      | <i>Nostocaceae</i>       | <i>Nostoc</i> sp.                                 | Freshwater Lake | Plankton     | Lagoa do Congro             | São Miguel |
| BACA0070 | <i>Nostocales</i>      | <i>Rivulariaceae</i>     | <i>Calothrix</i> sp.                              | Freshwater Lake | Plankton     | Lagoa do Congro             | São Miguel |
| BACA0071 | <i>Synechococcales</i> | <i>Leptolyngbyaceae</i>  | <i>Planktolyngbya</i> cf. <i>limnetica</i>        | Freshwater Lake | Plankton     | Lagoa Negra                 | Flores     |
| BACA0072 | <i>Nostocales</i>      | <i>Rivulariaceae</i>     | <i>Calothrix</i> sp.                              | Freshwater Lake | Plankton     | Lagoa Verde                 | São Miguel |
| BACA0073 | <i>Nostocales</i>      | <i>Rivulariaceae</i>     | <i>Rivularia</i> sp.                              | Freshwater Lake | Plankton     | Lagoa de Santiago           | São Miguel |
| BACA0074 | <i>Nostocales</i>      | <i>Tolypothrichaceae</i> | <i>Tolypothrix</i> sp.                            | Freshwater Lake | Plankton     | Lagoa do Fogo               | São Miguel |
| BACA0075 | <i>Chroococcales</i>   | <i>Aphanothecaceae</i>   | <i>Aphanothece</i> sp.                            | Freshwater Lake | Plankton     | Lagoa das Furnas            | São Miguel |
| BACA0076 | <i>Synechococcales</i> | <i>Synechococcaceae</i>  | <i>Cyanobium</i> cf. <i>plancticum</i>            | Freshwater Lake | Rock biofilm | Lagoa Sete Cidades          | São Miguel |
| BACA0077 | <i>Synechococcales</i> | <i>Oculatellaceae</i>    | <i>Pegethrix</i> sp.                              | Freshwater Lake | Rock biofilm | Lagoa Sete Cidades          | São Miguel |
| BACA0078 | <i>Oscillatoriales</i> | <i>Oscillatoriaceae</i>  | <i>Phormidium</i> sp.                             | Freshwater Lake | Plankton     | Lagoa do Capitão            | Pico       |
| BACA0079 | <i>Nostocales</i>      | <i>Nostocaceae</i>       | <i>Nostoc</i> s.l.                                | Freshwater Lake | Plankton     | Lagoa do Capitão            | Pico       |
| BACA0080 | <i>Nostocales</i>      | <i>Rivulariaceae</i>     | <i>Calothrix</i> sp.                              | Freshwater Lake | Plankton     | Lagoa das Empadadas Norte   | São Miguel |
| BACA0081 | <i>Nostocales</i>      | <i>Nostocaceae</i>       | <i>Cylindrospermum</i> sp.                        | Freshwater Lake | Plankton     | Lagoa Rasa das Sete Cidades | São Miguel |
| BACA0082 | <i>Nostocales</i>      | <i>Nostocaceae</i>       | <i>Nostoc</i> sp.                                 | Freshwater Lake | Plankton     | Lagoa Negra                 | Flores     |
| BACA0083 | <i>Nostocales</i>      | <i>Rivulariaceae</i>     | <i>Rivularia</i> sp.                              | Freshwater Lake | Plankton     | Lagoa Verde                 | São Miguel |
| BACA0084 | <i>Nostocales</i>      | <i>Microchaetaceae</i>   | <i>Coleospermum</i> sp.                           | Freshwater Lake | Plankton     | Lagoa do Fogo               | São Miguel |
| BACA0085 | <i>Nostocales</i>      | <i>Microchaetaceae</i>   | <i>Coleospermum</i> sp.                           | Freshwater Lake | Plankton     | Lagoa do Caiado             | Pico       |
| BACA0086 | <i>Nostocales</i>      | <i>Nostocaceae</i>       | <i>Nostoc</i> sp.                                 | Freshwater Lake | Plankton     | Lagoa Rasa                  | Flores     |
| BACA0087 | <i>Nostocales</i>      | <i>Nostocaceae</i>       | <i>Nostoc</i> sp.                                 | Freshwater Lake | Plankton     | Lagoa de Santiago           | São Miguel |
| BACA0090 | <i>Nostocales</i>      | <i>Hapalosiphonaceae</i> | <i>Hapalosiphon</i> sp.                           | Terrestrial     | Biofilm      | Sete Cidades                | São Miguel |
| BACA0091 | <i>Nostocales</i>      | <i>Nostocaceae</i>       | <i>Nostoc</i> sp.                                 | Terrestrial     | Biofilm      | Sete Cidades                | São Miguel |
| BACA0092 | <i>Nostocales</i>      | <i>Nostocaceae</i>       | <i>Nostoc</i> sp.                                 | Stream          | Benthic      | Lagoa do Fogo               | São Miguel |
| BACA0093 | <i>Nostocales</i>      | <i>Tolypothrichaceae</i> | <i>Tolypothrix</i> sp.                            | Stream          | Benthic      | Ribeira do Guilherme        | São Miguel |
| BACA0094 | <i>Nostocales</i>      | <i>Rivulariaceae</i>     | <i>Calothrix</i> sp.                              | Stream          | Benthic      | Ribeira do Guilherme        | São Miguel |
| BACA0095 | <i>Nostocales</i>      | <i>Nostocaceae</i>       | <i>Nostoc</i> sp.                                 | Tree            | Biofilm      | Janela do Inferno           | São Miguel |
| BACA0096 | <i>Nostocales</i>      | <i>Nostocaceae</i>       | <i>Nostoc</i> sp.                                 | Tree            | Biofilm      | Janela do Inferno           | São Miguel |
| BACA0097 | <i>Nostocales</i>      | <i>Nostocaceae</i>       | <i>Cylindrospermum</i> cf. <i>musciola</i>        | Terrestrial     | Biofilm      | Lagoa do Canário            | São Miguel |
| BACA0098 | <i>Nostocales</i>      | <i>Tolypothrichaceae</i> | <i>Tolypothrix</i> sp.                            | Stream          | Benthic      | Ribeira do Guilherme        | São Miguel |

|          |                        |                             |                                             |                 |              |                                 |             |
|----------|------------------------|-----------------------------|---------------------------------------------|-----------------|--------------|---------------------------------|-------------|
| BACA0099 | <i>Nostocales</i>      | <i>Nostocaceae</i>          | <i>Nostoc</i> sp.                           | Terrestrial     | Biofilm      | Sete Cidades                    | São Miguel  |
| BACA0100 | <i>Nostocales</i>      | <i>Rivulariaceae</i>        | <i>Calothrix</i> sp.                        | Stream          | Benthic      | Ribeira do Salto                | Santa Maria |
| BACA0101 | <i>Nostocales</i>      | <i>Microchaetaceae</i>      | <i>Coleospermum</i> sp.                     | Terrestrial     | Biofilm      | Lagoa do Canário (Soil Biofilm) | São Miguel  |
| BACA0102 | <i>Nostocales</i>      | <i>Microchaetaceae</i>      | <i>Coleospermum</i> sp.                     | Terrestrial     | Biofilm      | Lagoa do Canário (Soil Biofilm) | São Miguel  |
| BACA0103 | <i>Nostocales</i>      | <i>Nostocaceae</i>          | <i>Nostoc</i> sp.                           | Terrestrial     | Biofilm      | Lagoa do Canário (Soil Biofilm) | São Miguel  |
| BACA0104 | <i>Nostocales</i>      | <i>Nostocaceae</i>          | <i>Nostoc</i> sp.                           | Stream          | Benthic      | Ribeira de São Francisco        | Santa Maria |
| BACA0105 | <i>Nostocales</i>      | <i>Rivulariaceae</i>        | <i>Calothrix</i> sp.                        | Stream          | Benthic      | Ribeira de São Francisco        | Santa Maria |
| BACA0106 | <i>Oscillatoriales</i> | <i>Oscillatoriaceae</i>     | <i>Tychonema</i> sp.                        | Artificial lake | Plankton     | Furnas                          | São Miguel  |
| BACA0107 | <i>Nostocales</i>      | <i>Nostocaceae</i>          | <i>Hydrocoryne</i> cf. <i>spongiosa</i>     | Artificial lake | Plankton     | Furnas                          | São Miguel  |
| BACA0108 | <i>Oscillatoriales</i> | <i>Oscillatoriaceae</i>     | <i>Lyngbya</i> cf. <i>martensiana</i>       | Cave            | Rock biofilm | Furnas                          | São Miguel  |
| BACA0109 | <i>Nostocales</i>      | <i>Nostocaceae</i>          | <i>Nostoc</i> sp.                           | Freshwater Lake | Plankton     | Lagoa do Paul                   | Pico        |
| BACA0110 | <i>Nostocales</i>      | <i>Microchaetaceae</i>      | <i>Coleospermum</i> sp.                     | Thermal pool    | Benthic      | Poça da Silvina                 | São Miguel  |
| BACA0111 | <i>Nostocales</i>      | <i>Microchaetaceae</i>      | <i>Microchaete bulbosa</i>                  | Thermal spring  | Benthic      | Água de Prata                   | São Miguel  |
| BACA0112 | <i>Synechococcales</i> | <i>Leptolyngbyaceae</i>     | <i>Leptolyngbya gelatinosa</i>              | Thermal spring  | Benthic      | Água do Rego                    | São Miguel  |
| BACA0113 | <i>Oscillatoriales</i> | <i>Oscillatoriaceae</i>     | <i>Phormidium</i> sp.                       | Thermal stream  | Benthic      | Ribeira Amarela                 | São Miguel  |
| BACA0114 | <i>Nostocales</i>      | <i>Hapalosiphonaceae</i>    | <i>Westiellopsis</i> sp.                    | Thermal stream  | Benthic      | Ribeira Amarela                 | São Miguel  |
| BACA0116 | <i>Nostocales</i>      | <i>Chlorogloeopsidaceae</i> | <i>Chlorogloeopsis fritschii</i>            | Thermal pool    | Benthic      | Poça da Silvina                 | São Miguel  |
| BACA0117 | <i>Nostocales</i>      | <i>Microchaetaceae</i>      | <i>Coleospermum</i> sp.                     | Thermal stream  | Benthic      | Ribeira Amarela                 | São Miguel  |
| BACA0118 | <i>Nostocales</i>      | <i>Hapalosiphonaceae</i>    | <i>Mastigocladus</i> sp.                    | Thermal stream  | Benthic      | Ribeira Amarela                 | São Miguel  |
| BACA0119 | <i>Nostocales</i>      | <i>Microchaetaceae</i>      | <i>Coleospermum</i> sp.                     | Thermal spring  | Benthic      | Nascente da Morangueira         | São Miguel  |
| BACA0120 | <i>Nostocales</i>      | <i>Microchaetaceae</i>      | <i>Coleospermum</i> sp.                     | Thermal pool    | Benthic      | Poça da Silvina                 | São Miguel  |
| BACA0121 | <i>Nostocales</i>      | <i>Hapalosiphonaceae</i>    | <i>Mastigocladus laminosus</i>              | Thermal spring  | Benthic      | Água do Rego                    | São Miguel  |
| BACA0122 | <i>Nostocales</i>      | <i>Hapalosiphonaceae</i>    | <i>Mastigocladus laminosus</i>              | Thermal pool    | Benthic      | Poça da Silvina                 | São Miguel  |
| BACA0123 | <i>Synechococcales</i> | <i>Leptolyngbyaceae</i>     | <i>Leptolyngbya granulifera</i>             | Thermal spring  | Benthic      | Nascente Água das Quenturas     | São Miguel  |
| BACA0124 | <i>Nostocales</i>      | <i>Microchaetaceae</i>      | <i>Coleospermum</i> sp.                     | Fumarole        | Biofilm      | Caldeira do Esguicho            | São Miguel  |
| BACA0125 | <i>Nostocales</i>      | <i>Hapalosiphonaceae</i>    | <i>Mastigocladus laminosus</i>              | Thermal pool    | Benthic      | Poça da Silvina                 | São Miguel  |
| BACA0126 | <i>Nostocales</i>      | <i>Chlorogloeopsidaceae</i> | <i>Chlorogloeopsis fritschii</i>            | Thermal pool    | Benthic      | Poça da Silvina                 | São Miguel  |
| BACA0127 | <i>Synechococcales</i> | <i>Leptolyngbyaceae</i>     | <i>Leptolyngbya</i> cf. <i>subuliformis</i> | Thermal spring  | Benthic      | Nascente Água das Quenturas     | São Miguel  |
| BACA0128 | <i>Nostocales</i>      | <i>Hapalosiphonaceae</i>    | <i>Mastigocladus laminosus</i>              | Thermal spring  | Benthic      | Nascente Água das Quenturas     | São Miguel  |
| BACA0129 | <i>Nostocales</i>      | <i>Chlorogloeopsidaceae</i> | <i>Chlorogloeopsis fritschii</i>            | Thermal spring  | Benthic      | Nascente Água das Quenturas     | São Miguel  |
| BACA0130 | <i>Nostocales</i>      | <i>Hapalosiphonaceae</i>    | <i>Mastigocladus laminosus</i>              | Thermal pool    | Benthic      | Furnas                          | São Miguel  |
| BACA0131 | <i>Nostocales</i>      | <i>Chlorogloeopsidaceae</i> | <i>Chlorogloeopsis fritschii</i>            | Thermal pool    | Benthic      | Poça da Silvina                 | São Miguel  |

|          |                        |                             |                                           |                 |          |                             |            |
|----------|------------------------|-----------------------------|-------------------------------------------|-----------------|----------|-----------------------------|------------|
| BACA0132 | <i>Nostocales</i>      | <i>Hapalosiphonaceae</i>    | <i>Mastigocladus</i> sp.                  | Thermal spring  | Benthic  | Nascente Água das Quenturas | São Miguel |
| BACA0133 | <i>Nostocales</i>      | <i>Microchaetaceae</i>      | <i>Coleospermum</i> sp.                   | Thermal spring  | Benthic  | Nascente Água das Quenturas | São Miguel |
| BACA0134 | <i>Chroococcales</i>   | <i>Chroococcaceae</i>       | <i>Gloeocapsopsis</i> cf. <i>dvorakii</i> | Thermal pool    | Benthic  | Poça da Silvina             | São Miguel |
| BACA0135 | <i>Nostocales</i>      | <i>Hapalosiphonaceae</i>    | <i>Fischerella</i> sp.                    | Thermal pool    | Benthic  | Poças Dona Beja             | São Miguel |
| BACA0136 | <i>Nostocales</i>      | <i>Chlorogloeopsidaceae</i> | <i>Chlorogloeopsis fritschii</i>          | Thermal spring  | Benthic  | Nascente Água das Quenturas | São Miguel |
| BACA0137 | <i>Nostocales</i>      | <i>Microchaetaceae</i>      | <i>Coleospermum</i> sp.                   | Fumarole        | Biofilm  | Caldeira Grande             | São Miguel |
| BACA0138 | <i>Nostocales</i>      | <i>Microchaetaceae</i>      | <i>Coleospermum</i> sp.                   | Fumarole        | Biofilm  | Caldeira do Asmodeu         | São Miguel |
| BACA0139 | <i>Nostocales</i>      | <i>Microchaetaceae</i>      | <i>Coleospermum</i> sp.                   | Fumarole        | Biofilm  | Caldeira do Asmodeu         | São Miguel |
| BACA0140 | <i>Nostocales</i>      | <i>Nostocaceae</i>          | <i>Cylindrospermum</i> sp.                | Stream          | Benthic  | Ribeira do Guilherme        | São Miguel |
| BACA0141 | <i>Synechococcales</i> | <i>Pseudanabaenaceae</i>    | <i>Pseudanabaena</i> sp.                  | Freshwater Lake | Plankton | Lagoa do Paul               | Pico       |
| BACA0142 | <i>Synechococcales</i> | <i>Leptolyngbyaceae</i>     | <i>Leptolyngbya</i> sp.                   | Fumarole        | Biofilm  | Água do Caldeirão           | São Miguel |
| BACA0143 | <i>Nostocales</i>      | <i>Hapalosiphonaceae</i>    | <i>Mastigocladus laminosus</i>            | Thermal stream  | Benthic  | Ribeira Amarela             | São Miguel |
| BACA0144 | <i>Synechococcales</i> | <i>Leptolyngbyaceae</i>     | <i>Leptolyngbya granulifera</i>           | Thermal pool    | Benthic  | Poça da Silvina             | São Miguel |
| BACA0145 | <i>Synechococcales</i> | <i>Leptolyngbyaceae</i>     | <i>Leptolyngbya gelatinosa</i>            | Thermal stream  | Benthic  | Ribeira Amarela             | São Miguel |
| BACA0146 | <i>Synechococcales</i> | <i>Leptolyngbyaceae</i>     | <i>Leptolyngbya</i> sp.                   | Thermal spring  | Benthic  | Nascente Água das Quenturas | São Miguel |
| BACA0147 | <i>Nostocales</i>      | <i>Tolypothrichaceae</i>    | <i>Tolypothrix</i> sp.                    | Freshwater Lake | Plankton | Lagoa do Fogo               | São Miguel |
| BACA0148 | <i>Chroococcales</i>   | <i>Microcystaceae</i>       | <i>Microcystis aeruginosa</i>             | Freshwater Lake | Plankton | Lagoa Azul                  | São Miguel |
| BACA0149 | <i>Synechococcales</i> | <i>Leptolyngbyaceae</i>     | <i>Leptolyngbya</i> sp.                   | Fumarole        | Biofilm  | Caldeira do Asmodeu         | São Miguel |
| BACA0150 | <i>Nostocales</i>      | <i>Hapalosiphonaceae</i>    | <i>Mastigocladus</i> sp.                  | Thermal stream  | Benthic  | Ribeira Amarela             | São Miguel |
| BACA0151 | <i>Synechococcales</i> | <i>Leptolyngbyaceae</i>     | <i>Leptolyngbya</i> sp.                   | Thermal stream  | Benthic  | Ribeira Amarela             | São Miguel |
| BACA0203 | <i>Synechococcales</i> | <i>Leptolyngbyaceae</i>     | <i>Leptodesmis</i> sp.                    | Freshwater Lake | Plankton | Lagoa do Peixe              | Pico       |
| BACA0204 | <i>Synechococcales</i> | <i>Leptolyngbyaceae</i>     | <i>Leptolyngbya</i> sp.                   | Freshwater Lake | Plankton | Lagoa de São Brás           | São Miguel |
| BACA0223 | <i>Synechococcales</i> | <i>Synechococcaceae</i>     | <i>Anathece minutissima</i>               | Freshwater Lake | Plankton | Lagoa Verde                 | São Miguel |
| BACA0224 | <i>Synechococcales</i> | <i>Synechococcaceae</i>     | <i>Cyanobium plancticum</i>               | Freshwater Lake | Plankton | Lagoa Verde                 | São Miguel |
| BACA0229 | <i>Synechococcales</i> | <i>Leptolyngbyaceae</i>     | <i>Leptolyngbya</i> sp.                   | Freshwater Lake | Plankton | Lagoa Funda                 | Flores     |
| BACA0238 | <i>Nostocales</i>      | <i>Nostocaceae</i>          | <i>Nostoc</i> sp.                         | Freshwater Lake | Plankton | Lagoa do Congro             | São Miguel |
| BACA0242 | <i>Nostocales</i>      | <i>Rivulariaceae</i>        | <i>Calothrix</i> sp.                      | Freshwater Lake | Plankton | Lagoa das Furnas            | São Miguel |
| BACA0293 | <i>Nostocales</i>      | <i>Aphanizomenonaceae</i>   | <i>Aphanizomenon</i> sp.                  | Freshwater Lake | Plankton | Lagoa das Empadadas Sul     | São Miguel |
| BACA0294 | <i>Nostocales</i>      | <i>Aphanizomenonaceae</i>   | <i>Aphanizomenon</i> sp.                  | Freshwater Lake | Plankton | Lagoa Verde                 | São Miguel |

**Table S2.** PCR amplifications of MC (mcyC, mcyD, mcyE, mcyG), STX (sxtA, sxtG, sxtH, sxtI) and CYN (cyrB, cyrC) biosynthesis encoding genes and ESI-LC-MS/MS results, concentrations of MC-LR, SXT, and CYN. “+”: amplification of cyanotoxins-producing gene/toxin presence on ESI-LC-MS/MS ; “-”: absence of cyanotoxins-producing amplification/toxin absence on ESI-LC-MS/MS; “\*” Detection of ion ADMAAdda

[illegible]

[illegible]

[illegible]

[illegible]

**Table S4.** ESI-LC-MS/MS analysis parameters for the identification of CYN, MC-LR, and STX.

| Cyanotoxin | Retention Time (min) | Precursor ion (m/z) | Product ions | Collision energy | Dwell Time | Polarity | Type   |
|------------|----------------------|---------------------|--------------|------------------|------------|----------|--------|
| CYN        | 6.37                 | 416.1               | 336          | 20               | 150        | Positive | Target |
|            |                      |                     | 318          |                  |            |          |        |
|            |                      |                     | 274          |                  |            |          |        |
|            |                      |                     | 194          |                  |            |          |        |
| MC-LR      | 7.40                 | 995.5               | 977.28       | 35               | 150        | Positive | Target |
|            |                      |                     | 866.33       |                  |            |          |        |
|            |                      |                     | 599.16       |                  |            |          |        |
|            |                      |                     | 553.18       |                  |            |          |        |
| STX        | 5.75                 | 300.08              | 282.28       | 35               | 150        | Positive | Target |
|            |                      |                     | 265.17       |                  |            |          |        |
|            |                      |                     | 241.00       |                  |            |          |        |
|            |                      |                     | 240.25       |                  |            |          |        |
|            |                      |                     | 221.00       |                  |            |          |        |
|            |                      |                     | 204.08       |                  |            |          |        |
|            |                      |                     | 186.08       |                  |            |          |        |

**Table S3.** Sequence identity (%) of 16S rRNA gene fragment between BACA strains and other cyanobacterial sequences available in GenBank (NCBI).

| Strain code | Strain                        | Accession number | Length (bp) | Coverage (%) | Identity (%) | Closest match (Accession number)                                   |
|-------------|-------------------------------|------------------|-------------|--------------|--------------|--------------------------------------------------------------------|
| BACA0025    | <i>unidentified species</i>   | MT176703.2       | 1386        | 100          | 96.25        | <i>Cylindrospermum catenatum</i> CCALA 999 (KF052615.1)            |
|             |                               |                  |             | 100          | 96.18        | <i>Cylindrospermum</i> sp. NIES-4074 (AP018269.1)                  |
| BACA0031    | <i>unidentified species</i>   | MW776414         | 1137        | 99           | 97.18        | <i>Anabaena</i> sp. 14-VSmolV10 (KT290364.1)                       |
|             |                               |                  |             | 99           | 96.83        | <i>Cylindrospermum catenatum</i> CCALA 999 (KF052615.1)            |
| BACA0041    | <i>Aphanizomenon gracile</i>  | MT176711.3       | 1425        | 99           | 99.58        | <i>Aphanizomenon</i> cf. <i>gracile</i> 271 (AJ293125.1)           |
|             |                               |                  |             | 99           | 98.52        | <i>Aphanizomenon gracile</i> HEANEY/Camb 1986 140 1/1 (AJ630444.1) |
| BACA0148    | <i>Microcystis aeruginosa</i> | MT176750.2       | 1365        | 99           | 99.71        | <i>Microcystis aeruginosa</i> NIES-90 (LC557463.1)                 |
|             |                               |                  |             | 100          | 99.63        | <i>Microcystis aeruginosa</i> PMC 679.10 (MH892892.1)              |
